# Supplementary material for: Genetic characterization of a novel G9P[23] rotavirus A strain identified in southwestern China with evidence of a reassortment event between human and porcine strains
Source: Springer Nature journal article supplement (doi:10.1007/s00705-019-04188-y), 2019-02-27
Supplement: MOESM1 [file 16513550]

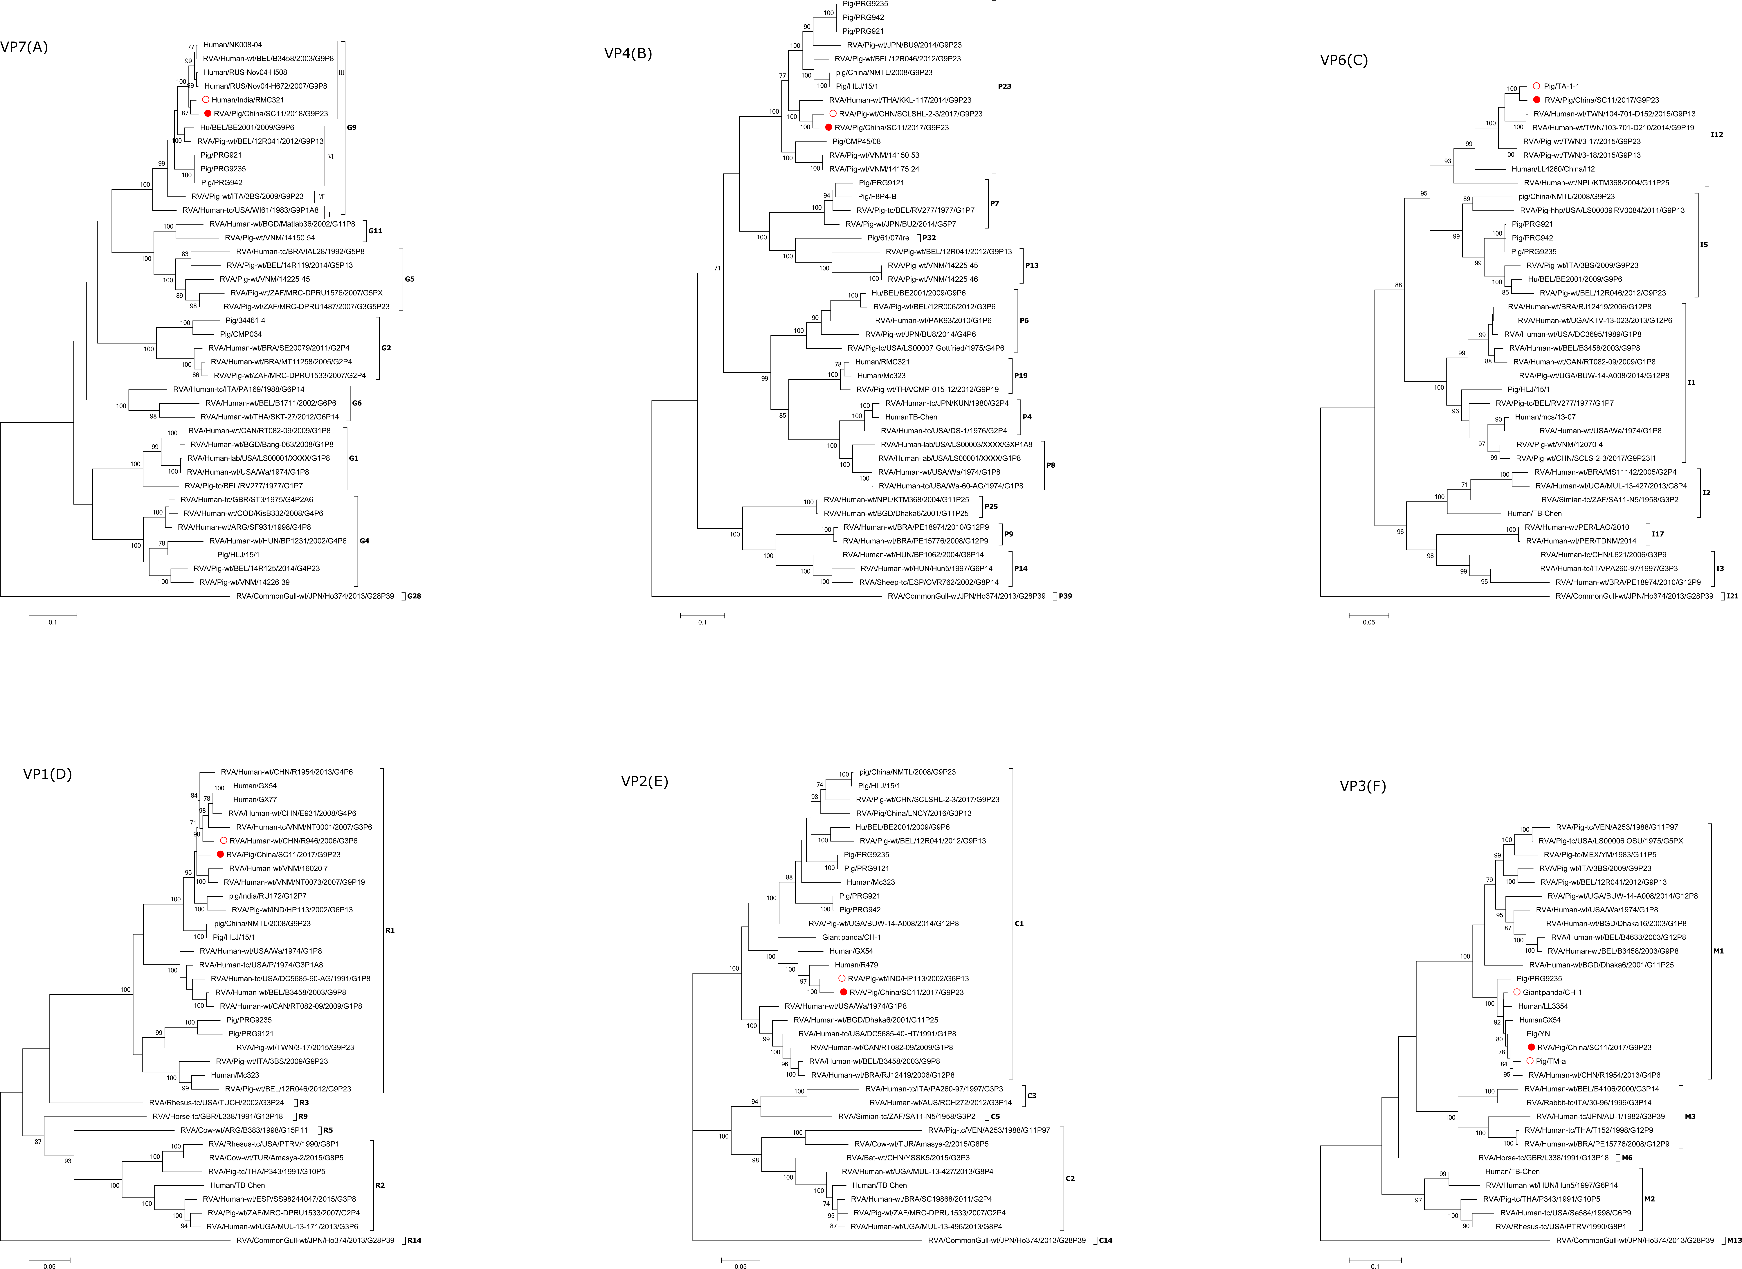


Fig. S1 Phylogenetic analysis of RVA/Pig/China/SC11/2017/G9P[23]. (A) Phylogenetic analysis based on the VP7 sequence in the G9 genotype. (B) Phylogenetic analysis based on the VP4 sequence in the P[23] genotype. (C) Phylogenetic analysis based on the VP6 sequence in the I12 genotype. (D) Phylogenetic analysis based on the VP1 sequence in the R1 genotype. (E) Phylogenetic analysis based on the VP2 sequence in the C1 genotype. (F) Phylogenetic analysis based on the VP3 sequence in the M1 genotype. The position of strain RVA/Pig/China/SC11/2017/G9P[23] is shown by a filled red circle, while the most similar strain is shown by hollow red circle. Tree reliability was evaluated using the bootstrap method with 1,000 replications. Only bootstrap values >70% at branch points are shown. Outgroup is RVA/CommonGull-wt/JPN/Ho374/2013/G28P39. Scale bar at the bottom indicates nucleotide substitutions per site.


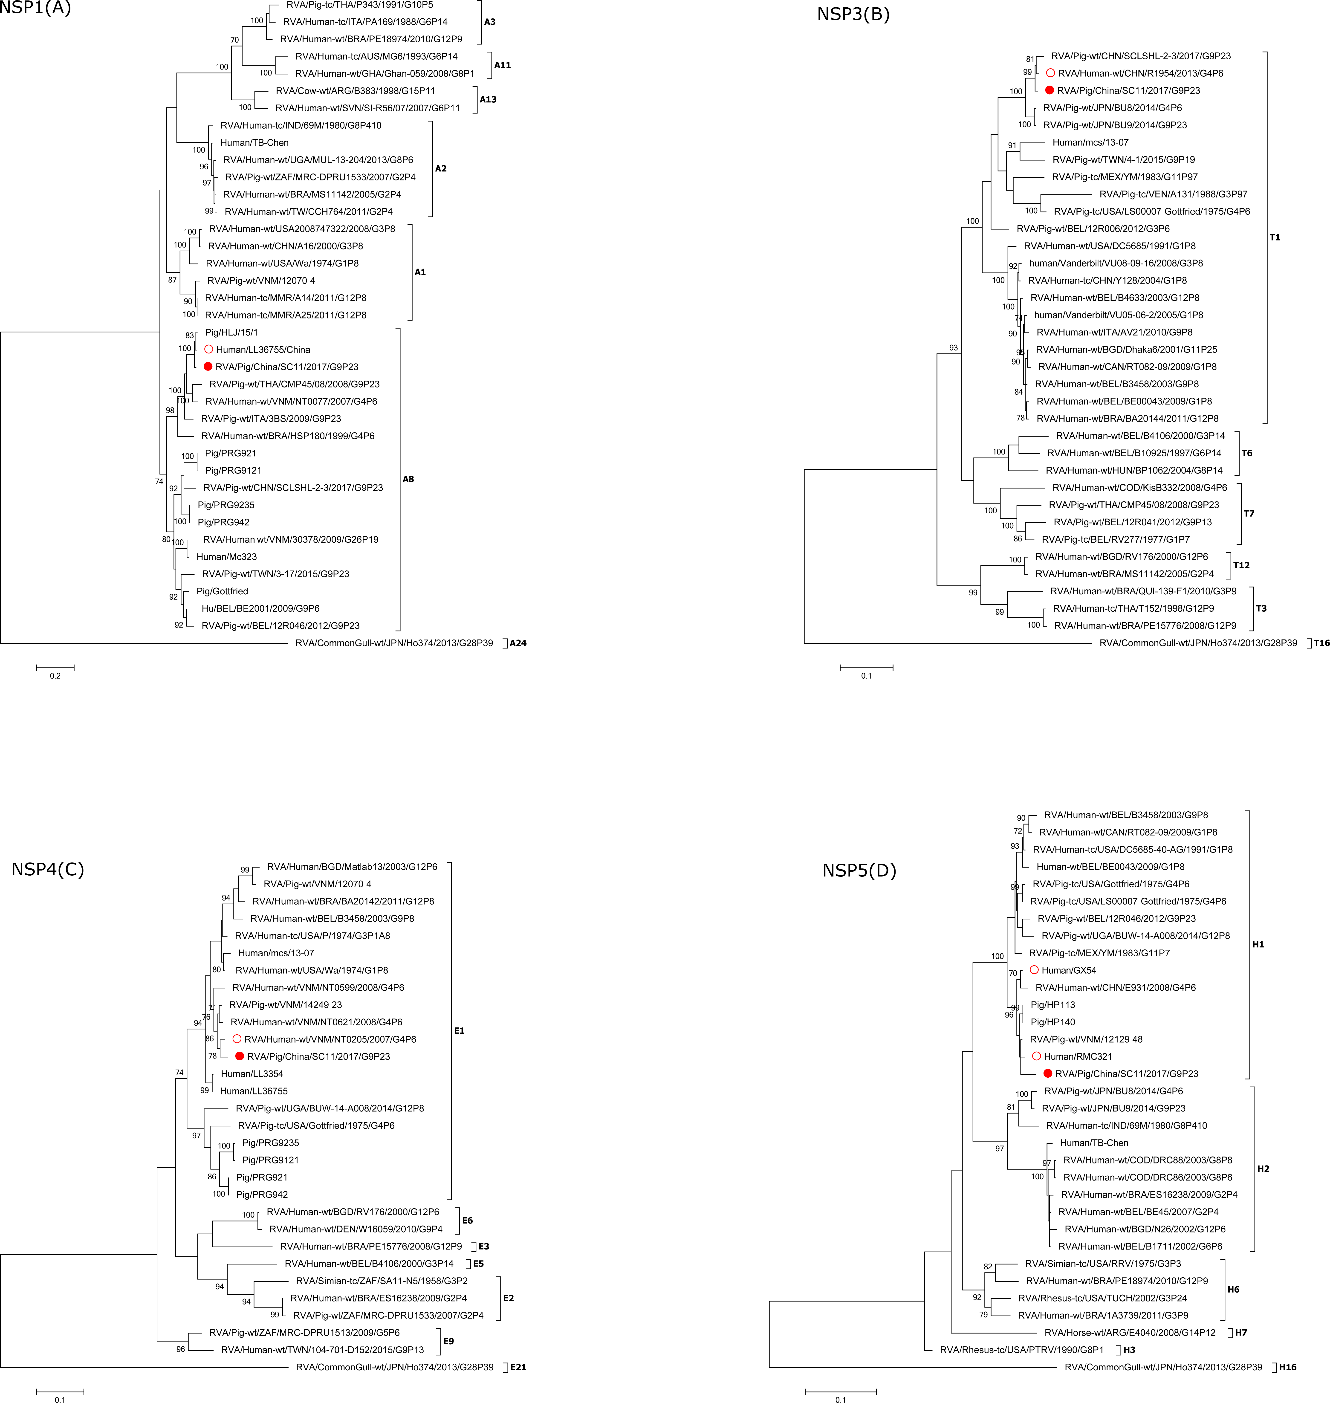


Fig. S2 Phylogenetic analysis of RVA/Pig/China/SC11/2017/G9P[23]. (A) Phylogenetic analysis based on the NSP1sequence in the A8 genotype. (B) Phylogenetic analysis based on the NSP3 sequence in the T1 genotype. (C) Phylogenetic analysis based on the NSP4 sequence in the E1 genotype. (D) Phylogenetic analysis based on the NSP5 sequence in the H1 genotype. The position of strain RVA/Pig/China/SC11/2017/G9P[23] is shown by a filled red circle, while the most similar strain is shown by hollow red circle. Tree reliability was evaluated using the bootstrap method with 1,000 replications. Only bootstrap values >70% at branch points are shown. Outgroup is RVA/CommonGull-wt/JPN/Ho374/2013/G28P39. Scale bar at the bottom indicates nucleotide substitutions per site

Table S1 Sequencing information about strain

| Sample | Raw Reads | Clean Reads | Effective Rate(%) | Error Rate(%) |
| --- | --- | --- | --- | --- |
| RVA/Pig/China/SC11/2017/G9P23 | 30,687,336 | 29,366,474 | 95.70 | 0.11 |

Table S2 Genotype nature of the eleven gene segments of Rotavirus A (RVA) strains RVA/Pig/China/SC11/2017/G9P[23]with those of selected RVA strains with known genomic constellations.

| Strain | Genotype | | | | | | | | | | |
| --- | --- | --- | --- | --- | --- | --- | --- | --- | --- | --- | --- |
|  | VP7 | VP4 | VP6 | VP1 | VP2 | VP3 | NSP1 | NSP2 | NSP3 | NSP4 | NSP5 | |
| **RVA/Pig/China/SC11/2017/G9P[23]** | **G9** | **P23** | **I12** | **R1** | **C1** | **M1** | **A8** | **N1** | **T1** | **E1** | **H1** | |
| RVA/Pig-tc/BEL/RV277/1977/G1P[7] | G1 | P7 | I1 | **R1** | **C1** | **M1** | **A8** | **N1** | T7 | **E1** | **H1** | |
| RVA/Giant panda-tc/CHN/CH-1/2009/G1P[7] | G1 | P7 | I5 | **R1** | **C1** | **M1※** | A1 | **N1** | T1 | **E1** | **H1** | |
| RVA/Human-tc/USA/Wa/1974/G1P8 | G1 | P8 | I1 | **R1** | **C1** | **M1** | A1 | **N1** | T7 | **E1** | **H1** | |
| RVA/Human-tc/USA/DS-1/1976/G2P1B[4] | G2 | P4 | I2 | R2 | C2 | M2 | A2 | N2 | T2 | E2 | H2 | |
| RVA/Pig-tc/VEN/A131/1988/G3P[7] | G3 | P7 | I5 | **R1** | C2 | **M1** | **A8** | **N1** | **T1** | **E1** | **H1** | |
| RVA/Human-wt/CHN/R946/2006/G3P[6] | G3 | P6 | I1 | **R1※** | **C1** | **M1** | A1 | **N1** | **T1** | **E1** | **H1** | |
| RVA/Human-tc/JPN/AU-l/1982/G3P3[9] | G3 | P9 | I3 | R3 | C3 | M3 | A3 | N3 | T3 | E3 | H3 | |
| RVA/Pig-wt/BEL/12R005/2012/G4P[7] | G4 | P7 | I5 | **R1** | **C1** | **M1** | **A8** | **N1** | T7 | **E1** | **H1** | |
| RVA/Pig/China/ HLJ/15/1/2015/G4P[23] | G4 | P23 | I1 | **R1** | **C1** | **M1** | **A8** | **N1** | **T1** | **E1** | **H1** | |
| RVA/Human-tc/CHN/R479/2004/G4P[6] | G4 | P6 | I5 | R3 | C3 | M3 | A3 | N3 | T7 | E3 | H3 | |
| RVA/Human/China/GX45/2010/G4P6 | G4 | P6 | I1 | **R1** | **C1** | **M1** | **A8** | **N1** | **T1** | **E1** | **H1※** | |
| RVA/Human-wt/VNM/NT0205/2007/G4P[6] | G4 | P6 | I1 | **R1** | **C1** | **M1** | A1 | **N1** | **T1** | **E1※** | **H1** | |
| RVA/Human-wt/CHN/R1954/2013/G4P[6] | G4 | P6 | I1 | **R1** | **C1** | **M1** | **A8** | **N1** | **T1※** | **E1** | **H1** | |
| RVA/Pig-tc/USA/OSU/1975/G5P9[7] | G5 | P7 | I5 | **R1** | **C1** | **M1** | **A8** | **N1** | **T1** | **E1** | **H1** | |
| RVA/Human/China/LL36755/2003/G5P[6] | G5 | P6 | - | **R1** | **C1** | **M1** | **A8※** | **N1** | T7 | **E1** | **H1** | |
| RVA/Human-wt/JPN/Ryukyu-1120/2011/G5P[6] | G5 | P6 | I5 | **R1** | **C1** | **M1** | **A8** | **N1** | **T1** | **E1** | **H1** | |
| RVA/Pig-wt/IND/HP113/2002/G6P[13] | G6 | P13 | I2 | **R1** | **C1※** | **M1** | **A8** | **N1** | T7 | **E1** | **H1** | |
| RVA/Pig-tc/KOR/174-1/2006/G8P[7] | G8 | P7 | I5 | **R1** | **C1** | M2 | **A8** | **N1** | **T1** | **E1** | **H1** | |
| RVA/Pig-wt/THA/CMP45/2008/G9P[23] | **G9** | **P23** | I5 | **R1** | **C1** | **M1** | **A8** | **N1** | T7 | **E1** | **H1** | |
| RVA/Pig/China/TA-1-1/2014/G9 | **G9** | - | **I12※** | - | - | - | - | - | - | - | - | |
| RVA/Pig-wt/CHN/SCLSHL-2-3/2017/G9P[23] | **G9** | **P23※** | I1 | **R1** | **C1** | **M1** | **A8** | **N1** | **T1** | **E1** | **H1** | |
| RVA/Pig-tc/KOR/PRG921/2006/G9P[23] | **G9** | **P23** | I5 | **R1** | **C1** | **M1** | **A8** | **N1** | **T1** | **E1** | **H1** | |
| RVA/Pig/China/TM-a/2009/G9P[23] | **G9** | **P23** | I5 | **R1** | **C1** | **M1※** | **A8** | **N1** | T7 | **E1** | **H1** | |
| RVA/Pig-tc/KOR/PRG942/2006/G9P[23] | **G9** | **P23** | I5 | **R1** | **C1** | **M1** | **A8** | **N1** | **T1** | **E1** | **H1** | |
| RVA/Pig-tc/CHN/NMTL/2008/G9P[23] | **G9** | **P23** | I5 | **R1** | **C1** | **M1** | **A8** | **N1** | **T1** | **E1** | **H1** | |
| RVA/Pig-wt/VNM/14175_24/2012/G9P[23] | **G9** | **P23** | I5 | **R1** | **C1** | **M1** | **A8** | **N1** | **T1** | **E1** | **H1** | |
| RVA/Pig-wt/BEL/12R046/2012/G9P[23] | **G9** | **P23** | I5 | **R1** | **C1** | **M1** | **A8** | **N1** | **T1** | **E1** | **H1** | |
| RVA/Pig-wt/TWN/3-17/2015/G9P[23] | **G9** | **P23** | **I12** | **R1** | **C1** | **M1** | **A8** | **N1** | **T1** | **E1** | **H1** | |
| RVA/Human-wt/THA/KKL-117/2014/G9P[23] | **G9** | **P23** | I5 | **R1** | **C1** | **M1** | **A8** | **N1** | **T1** | **E1** | **H1** | |
| RVA/Human/India/mcs/13-07/2007/G9P[6] | **G9** | P6 | I1 | **R1** | **C1** | **M1** | **A8** | **N1※** | **T1** | **E1** | **H1** | |
| RVA/Human/India/RMC321/2004/G9P[19] | **G9※** | P19 | I5 | **R1** | **C1** | **M1** | A1 | **N1** | **T1** | **E1** | **H1※** | |
| RVA/Human-wt/TWN/1118/2007/G9P[19] | **G9** | P19 | **I12** | **R1** | **C1** | **M1** | **A8** | **N1** | **T1** | **E1** | **H1** | |
| RVA/Human-wt/TWN/D153/2015/G9P[13] | **G9** | P13 | **I12** | **R1** | **C1** | **M1** | **A8** | **N1** | **T1** | E9 | **H1** | |
| RVA/Human-wt/BEL/BE2001/2009/G9P[6] | **G9** | P6 | I5 | **R1** | **C1** | **M1** | **A8** | **N1** | T7 | **E1** | **H1** | |

–, No sequence data were available in the GenBank data libraries. Boldface indicates the gene segments with a genotype identical to that of strain RVA/Pig/China/SC11/2017/G9P[23]. *Gene segments most similar to those of strain SC11. The WA-like,DS-1 like,AU-1-like and typical porcine RVA genotypes have been highlighted with green, red, orange and blue colors, respectively.

Table S3 Nucleotide identities of genome segments of strains RVA/Pig/China/SC11/2017/G9P[23] compared with the closest strains from NCBI

| Gene | Closely related strains | Nucleotide (%) | Accession  No |
| --- | --- | --- | --- |
| VP7 | RVA/Human/India/RMC321/2004/G9P[19] | 97.1% | AF501578 |
| VP4 | RVA/Pig-wt/CHN/SCLSHL-2-3/2017/G9P[23] | 96.3% | MH137266 |
| VP6 | RVA/Pig/China/TA-1-1/2014/G9 | 98.2% | KT820770 |
| VP1 | RVA/Human-wt/CHN/R946/2006/G3P[6] | 96.6% | KF726058 |
| VP2 | RVA/Pig-wt/IND/HP113/2002/G6P[13] | 96.6% | KM393171 |
| VP3 | RVA/Pig/China/TM-a/2009/G9P[23] | 96.1% | KC113251 |
| RVA/Giant panda/China/CH-1/G1P[7] | 96.1% | HQ641295 |
| NSP1 | RVA/Human-wt/China/ LL36755/2003/G5[6] | 97.9% | KC149934 |
| NSP2 | RVA/Human/India/mani-362/07 /2006/G4P[6] | 96.1% | HM348723 |
| NSP3 | RVA/Human-wt/CHN/R1954/2013/G4P[6] | 98.9% | KF726074 |
| NSP4 | RVA/Human-wt/VNM/NT0205/2007/G4P[6] | 97.5% | LC095930 |
| NSP5 | RVA/Human/China/GX45/2010/G4P[6] | 97.5% | KF041439 |
| RVA/Human/India/RMC321/G9P[19] | 97.5% | AY033396 |
